# Supplementary material
Source: PubMed Central journal article supplement (PMC6347673)
Supplement: pnas.1815117116.sapp.pdf [file pnas.1815117116.sapp.pdf]

1  
2  
3  
4  
5  
6  
7  
8  
9  
10  
11  
12  
13  
14  
15  
16  
17  
18  
19  
20  
21  
22  
23  
24  
25  
26  
27  
28  
29  
30  
31  
32  
33  
34  
35  
36  
37  
38  
39  
40  
41  
42  
43  
44  
45  
46  
47  
48  
49  
50  
51  
52  
53  
54  
55  
56  
57  
58  
59  
60  
61  
62

63  
64  
65  
66  
67  
68  
69  
70  
71  
72  
73  
74  
75  
76  
77  
78  
79  
80  
81  
82  
83  
84  
85  
86  
87  
88  
89  
90  
91  
92  
93  
94  
95  
96  
97  
98  
99  
100  
101  
102  
103  
104  
105  
106  
107  
108  
109  
110  
111  
112  
113  
114  
115  
116  
117  
118  
119  
120  
121  
122  
123  
124

## Supplementary Information for

### Ab initio thermodynamics of liquid and solid water

Bingqing Cheng, Edgar A. Engel, Jörg Behler, Christoph Dellago, and Michele Ceriotti

Corresponding Author Name.

E-mail: [bingqing.cheng@epfl.ch](mailto:bingqing.cheng@epfl.ch)

#### This PDF file includes:

- Supplementary text
- Figs. S1 to S4
- Captions for Databases S1 to S3
- References for SI reference citations

#### Other supplementary materials for this manuscript include the following:

- Databases S1 to S3

|     |                                                                                                                                                                                       |     |
|-----|---------------------------------------------------------------------------------------------------------------------------------------------------------------------------------------|-----|
| 125 | <b>Supporting Information Text</b>                                                                                                                                                    | 187 |
| 126 | <b>1. The revPBE0-D3 DFT functional</b>                                                                                                                                               | 188 |
| 127 |                                                                                                                                                                                       | 189 |
| 128 | <b>A. Details of the DFT calculations.</b> Both the DFT calculations for constructing the data set used to train and benchmark the                                                    | 190 |
| 129 | NN potential, and for performing the free energy perturbation from NN to DFT, are performed using the CP2K code (1). We                                                               | 191 |
| 130 | use the revPBE0 (2-4) functional, which incorporates 25% of exact exchange, and a Grimme D3 dispersion correction (5, 6).                                                             | 192 |
| 131 | Computational details of the calculations are the same as those used in Ref. (7). We have also attached the CP2K input file as                                                        | 193 |
| 132 | a part of the supplemental information.                                                                                                                                               | 194 |
| 133 |                                                                                                                                                                                       | 195 |
| 134 | <b>B. The difference in lattice energy between ordered ice Ih and ice Ic.</b> We compute lattice energy of 1) the most stable proton                                                  | 196 |
| 135 | ordered form of Ih (XIh with space-group symmetry $Cmc2_1$ ), and 2) proton ordered cubic ice (Ic with space-group symmetry                                                           | 197 |
| 136 | $I4_1md$ ). Since CP2K currently only supports $\Gamma$ -point calculations for hybrid functionals, these calculations are performed for                                              | 198 |
| 137 | 64-molecule $2 \times 2 \times 2$ supercells of the conventional 8-molecule orthorhombic unit cells. We perform geometrical optimization                                              | 199 |
| 138 | at a few different volumes close to the equilibrium volume of each system, with the optimized cell shape. We find that an                                                             | 200 |
| 139 | equivalent plane-wave energy cutoff of $1200Ry$ ensures a smooth energy-volume curve, although the difference in the lattice                                                          | 201 |
| 140 | energy $U^{I4_1md} - U^{Cmc2_1} = -0.3 \text{ meV}/\text{H}_2\text{O}$ is already converged at $800Ry$ .                                                                              | 202 |
| 141 |                                                                                                                                                                                       | 203 |
| 142 | <b>2. Construction of the neural network potential</b>                                                                                                                                | 204 |
| 143 |                                                                                                                                                                                       | 205 |
| 144 | <b>A. Architecture of the NN potential.</b> The high-dimensional neural network potential for water, which is flexible and fully                                                      | 206 |
| 145 | dissociable, has been constructed using the method proposed by Behler and Parrinello (8). In this approach the total energy of                                                        | 207 |
| 146 | the system is determined as a sum of environment-dependent atomic energies. For each atom in the system, the positions of                                                             | 208 |
| 147 | all neighboring atoms inside a cutoff radius, which has to be converged, are described by a set of atom-centered many-body                                                            | 209 |
| 148 | symmetry functions (9). These sets of function values are then used as input vectors for the atomic neural networks yielding                                                          | 210 |
| 149 | the atomic energy contributions. Consequently, the analytic total energy expression is a sum over the outputs of all individual                                                       | 211 |
| 150 | atomic neural networks, and analytic gradients for the calculation of the forces are readily available.                                                                               | 212 |
| 151 | Atomic environments within a cutoff radius of 12.0 a.u. are described using the symmetry function sets for hydrogen (27                                                               | 213 |
| 152 | functions) and oxygen (30 functions) atoms, selected by Morawietz et al. (10) in previous work on neural network potentials for                                                       | 214 |
| 153 | water employing GGA-DFT reference data. The hydrogen and oxygen atomic NNs consist of two hidden layers with 20 nodes                                                                 | 215 |
| 154 | each. We have used the total energies and all force components present in the training set.                                                                                           | 216 |
| 155 | <b>B. The training set of the NN potential.</b> The construction and the selection of the training set is of crucial importance in making                                             | 217 |
| 156 | an accurate and stable NN potential. In essence, the NN potential stores the shape of the PES as a set of fitting parameters,                                                         | 218 |
| 157 | which have been adjusted to the reference training set. When employing the NN in an atomistic simulation, the accuracy of the                                                         | 219 |
| 158 | predicted energy and forces for a given atomic environment is dictated by the structural similarity between this environment                                                          | 220 |
| 159 | and the ones contained the the reference set. If the given atomic environment is distant from anything the NN has been trained                                                        | 221 |
| 160 | on, the prediction will have a large error bar. Inaccurate energy predictions, in particular, tend to lead the system to explore                                                      | 222 |
| 161 | an un-physical part of the phase space.                                                                                                                                               | 223 |
| 162 | In our reference set of the neural network, there are a total of 1,593 64-molecule bulk liquid water structures. During the                                                           | 224 |
| 163 | NN training, these were randomly split into a training set of 80% of the structures to determine the NN parameters, and a test                                                        | 225 |
| 164 | set of the rest 20% structures to estimate the quality of the NN potential and to help avoid over-fitting. We have released the                                                       | 226 |
| 165 | whole reference set on the (to be inserted) public repository.                                                                                                                        | 227 |
| 166 | The first 1,000 structures in the training set were selected in order to cover a large part of the configurational space of                                                           | 228 |
| 167 | possible atomic environment, which is reflected in the relatively large spread in their energies. The remaining 593 structures                                                        | 229 |
| 168 | were extracted from PIMD simulations at about 300 K.                                                                                                                                  | 230 |
| 169 | At the end of the NN fitting procedure, a root-mean-square errors of $\approx 7 \text{ meV}/\text{H}_2\text{O}$ in energies and $\approx 120 \text{ meV}/\text{\AA}$ in               | 231 |
| 170 | forces are obtained for the test set. These errors are larger compared to those quoted for previous NN fits of water (about                                                           | 232 |
| 171 | $\approx 3 \text{ meV}/\text{H}_2\text{O}$ in energies and $\approx 110 \text{ meV}/\text{\AA}$ in forces (11)). However, this is simply due to the larger structural (and energetic) | 233 |
| 172 | diversity of our test (and training) set. When comparing the predictions of the NN potential and revPBE0-D3 calculations for                                                          | 234 |
| 173 | configurations generated from MD and PIMD simulations for liquid water at 300 K, the root-mean-square errors of energies                                                              | 235 |
| 174 | and forces are $\approx 2 \text{ meV}/\text{H}_2\text{O}$ and $\approx 110 \text{ meV}/\text{\AA}$ , respectively.                                                                    | 236 |
| 175 | The NN potentials generated from our training set are not only very accurate, but also highly stable: MD simulations of                                                               | 237 |
| 176 | bulk water can be performed at high temperatures of 800 K.                                                                                                                            | 238 |
| 177 |                                                                                                                                                                                       | 239 |
| 178 | <b>C. A comparison between CP2K and VASP for the training set.</b> In order to assess the intrinsic uncertainties in the revPBE0-D3                                                   | 240 |
| 179 | reference data arising from the computational details, the revPBE0-D3 energies of the first 1,000 structures in the training set                                                      | 241 |
| 180 | were re-computed with VASP (12), using the hard PAW potentials at the $\Gamma$ -point with a plane wave cutoff of 700 eV. Apart                                                       | 242 |
| 181 | from an obvious outlier which may result from an under-convergence of the self-consistent cycle, the agreement between the                                                            | 243 |
| 182 | results from CP2K and from VASP is very good. After removing the outlier, we measured the root-mean-square error of                                                                   | 244 |
| 183 | energies between the results from the two codes to be $6 \text{ meV}/\text{H}_2\text{O}$ for the first 1000 configurations of the training set, which is                              | 245 |
| 184 | smaller compared with the training error of the NN potential.                                                                                                                         | 246 |
| 185 | Considering the subtle difference in predictions from different DFT codes and pseudopotentials (13), we are encouraged by                                                             | 247 |
| 186 | the agreement between CP2K and VASP for the hybrid revPBE0-D3 functional.                                                                                                             | 248 |

249  
250  
251  
252  
253  
254  
255  
256  
257  
258  
259  
260  
261  
262  
263  
264  
265  
266  
267  
268  
269  
270  
271  
272  
273  
274  
275  
276  
277  
278  
279  
280  
281  
282  
283  
284  
285  
286  
287  
288  
289  
290  
291  
292  
293  
294  
295  
296  
297  
298  
299  
300  
301  
302  
303  
304  
305  
306  
307  
308  
309  
310

311  
312  
313  
314  
315  
316  
317  
318  
319  
320  
321  
322  
323  
324  
325  
326  
327  
328  
329  
330  
331  
332  
333  
334  
335  
336  
337  
338  
339  
340  
341  
342  
343  
344  
345  
346  
347  
348  
349  
350  
351  
352  
353  
354  
355  
356  
357  
358  
359  
360  
361  
362  
363  
364  
365  
366  
367  
368  
369  
370  
371  
372

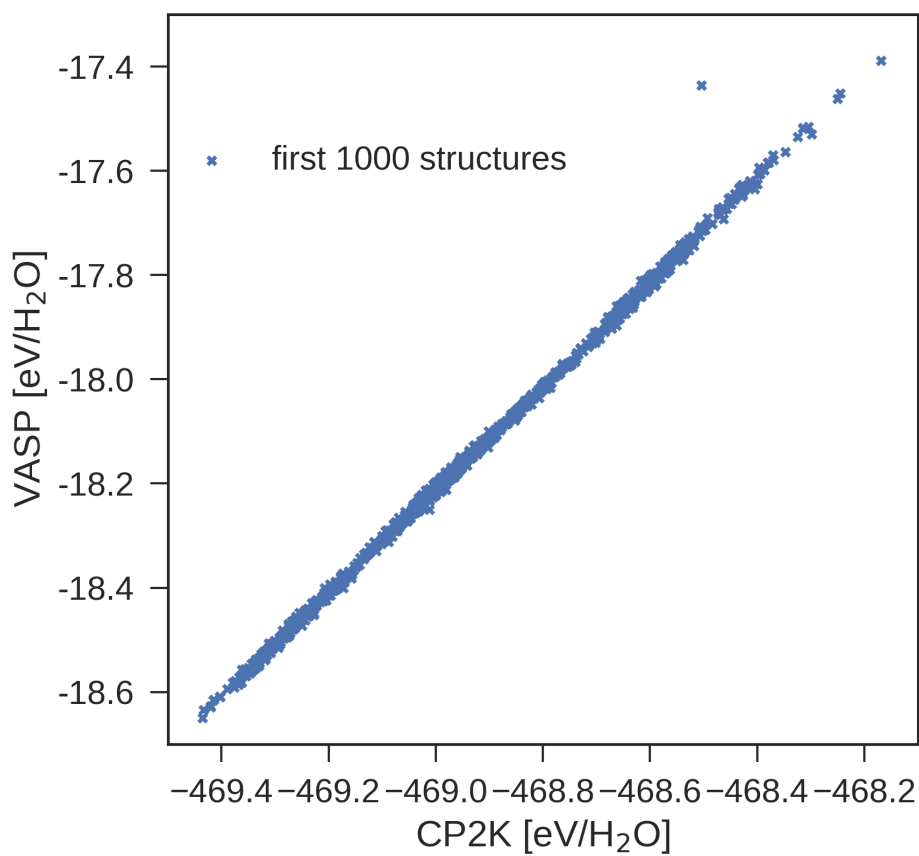

Fig. S1. A comparison between the revPBE0-D3 energies computed using CP2K and using VASP.

373 **D. A comparison between CP2K and MB-Pol for the training set.** We have also compared our revPBE0-D3 energies to those 435  
374 obtained from the well-established MB-pol water potential (14), which has been demonstrated to accurately reproduce the 436  
375 structural, dynamical and thermodynamical properties of liquid water and many phases of ice (14). Because the MB-pol 437  
376 water is non-dissociative and not designed for highly displaced hydrogen atoms (e.g. in water undergoing autoprotolysis), but 438  
377 the first 1000 structures in the training set include such configurations, we have re-computed the energies for the last 593 439  
378 structures in the training set, which was extracted from PIMD simulations. The agreement for these structures is excellent 440  
379 (the root-mean-square error of energies is 2.6 meV/H<sub>2</sub>O). 441

380 For completeness, we have further computed the MB-pol lattice energies of the proton-ordered forms of Ih and Ic with 442  
381 *Cmc2<sub>1</sub>* and *I4<sub>1</sub>md* symmetry, respectively, for which diffusion Monte Carlo (DMC) (15) and random phase approximation 443  
382 (RPA) (16) values are available for reference. Geometry-optimizations performed for the MB-pol optimized simulation cells 444  
383 (with molar volumes of 31.2 Å<sup>3</sup> and 31.6 Å<sup>3</sup> for Ih *Cmc2<sub>1</sub>* and Ic *I4<sub>1</sub>md*, respectively) suggest that Ih *Cmc2<sub>1</sub>* is 2 meV/H<sub>2</sub>O 445  
384 more stable than Ic *I4<sub>1</sub>md*. It is worth noting that upon geometry optimization the *Cmc2<sub>1</sub>* of the initial Ih structure is broken. 446  
385 This is in disagreement both with experiment (that finds the most stable proton-ordered form of Ih (XIh) to possess *Cmc2<sub>1</sub>* 447  
386 symmetry (17)) and the results of DFT studies employing diverse density functionals, including revPBE0-D3. Meanwhile Ic 448  
387 *I4<sub>1</sub>md* retains its symmetry in geometry optimizations. 449  
388 450

389 **E. The enthalpy of water based on the NN potential.** In Figure S3 we plot the enthalpy of ice Ih, Ic and liquid water systems 451  
390 computed from NPT simulations at 1 bar. 452  
391 453

392 **3. Comparison between two neural network potentials** 454  
393 455  
394 456  
395 457  
396 458  
397 459  
398 460  
399 461  
400 462  
401 463  
402 464  
403 465  
404 466  
405 467  
406 468  
407 469  
408 470  
409 471  
410 472  
411 473  
412 474  
413 475  
414 476  
415 477  
416 478  
417 479  
418 480  
419 481  
420 482  
421 483  
422 484  
423 485  
424 486  
425 487  
426 488  
427 489  
428 490  
429 491  
430 492  
431 493  
432 494  
433 495  
434 496

497  
498  
499  
500  
501  
502  
503  
504  
505  
506  
507  
508  
509  
510  
511  
512  
513  
514  
515  
516  
517  
518  
519  
520  
521  
522  
523  
524  
525  
526  
527  
528  
529  
530  
531  
532  
533  
534  
535  
536  
537  
538  
539  
540  
541  
542  
543  
544  
545  
546  
547  
548  
549  
550  
551  
552  
553  
554  
555  
556  
557  
558

559  
560  
561  
562  
563  
564  
565  
566  
567  
568  
569  
570  
571  
572  
573  
574  
575  
576  
577  
578  
579  
580  
581  
582  
583  
584  
585  
586  
587  
588  
589  
590  
591  
592  
593  
594  
595  
596  
597  
598  
599  
600  
601  
602  
603  
604  
605  
606  
607  
608  
609  
610  
611  
612  
613  
614  
615  
616  
617  
618  
619  
620

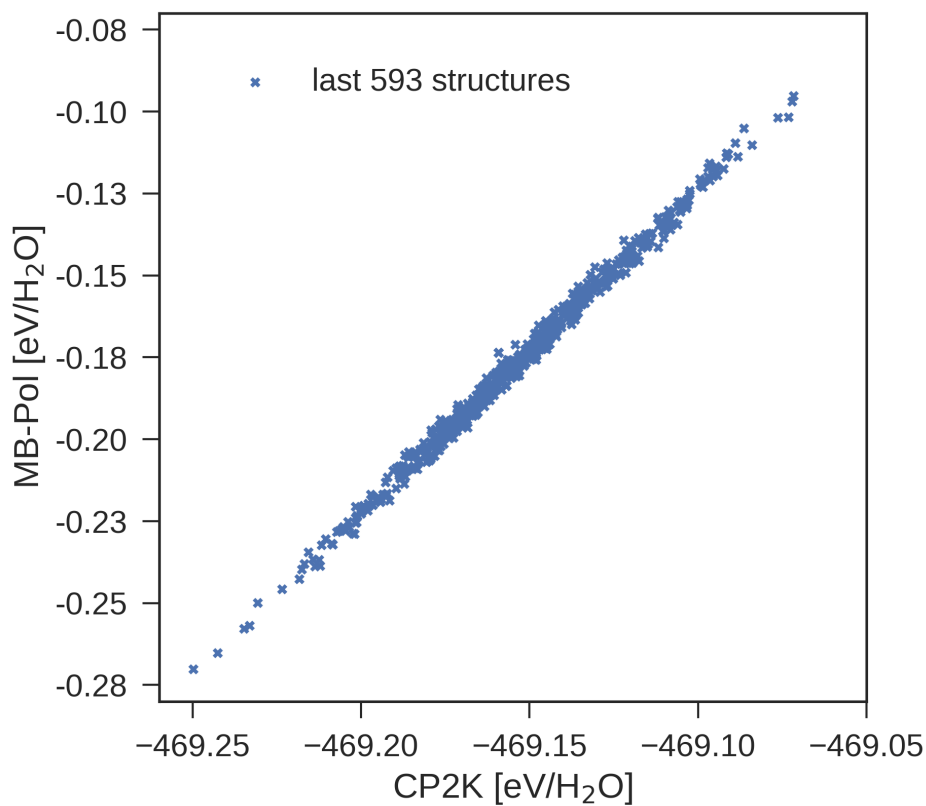

Fig. S2. A comparison between the revPBE0-D3 energies computed using CP2K, and the energies computed using the MB-Pol potential.

621  
622  
623  
624  
625  
626  
627  
628  
629  
630  
631  
632  
633  
634  
635  
636  
637  
638  
639  
640  
641  
642  
643  
644  
645  
646  
647  
648  
649  
650  
651  
652  
653  
654  
655  
656  
657  
658  
659  
660  
661  
662  
663  
664  
665  
666  
667  
668  
669  
670  
671  
672  
673  
674  
675  
676  
677  
678  
679  
680  
681  
682

683  
684  
685  
686  
687  
688  
689  
690  
691  
692  
693  
694  
695  
696  
697  
698  
699  
700  
701  
702  
703  
704  
705  
706  
707  
708  
709  
710  
711  
712  
713  
714  
715  
716  
717  
718  
719  
720  
721  
722  
723  
724  
725  
726  
727  
728  
729  
730  
731  
732  
733  
734  
735  
736  
737  
738  
739  
740  
741  
742  
743  
744

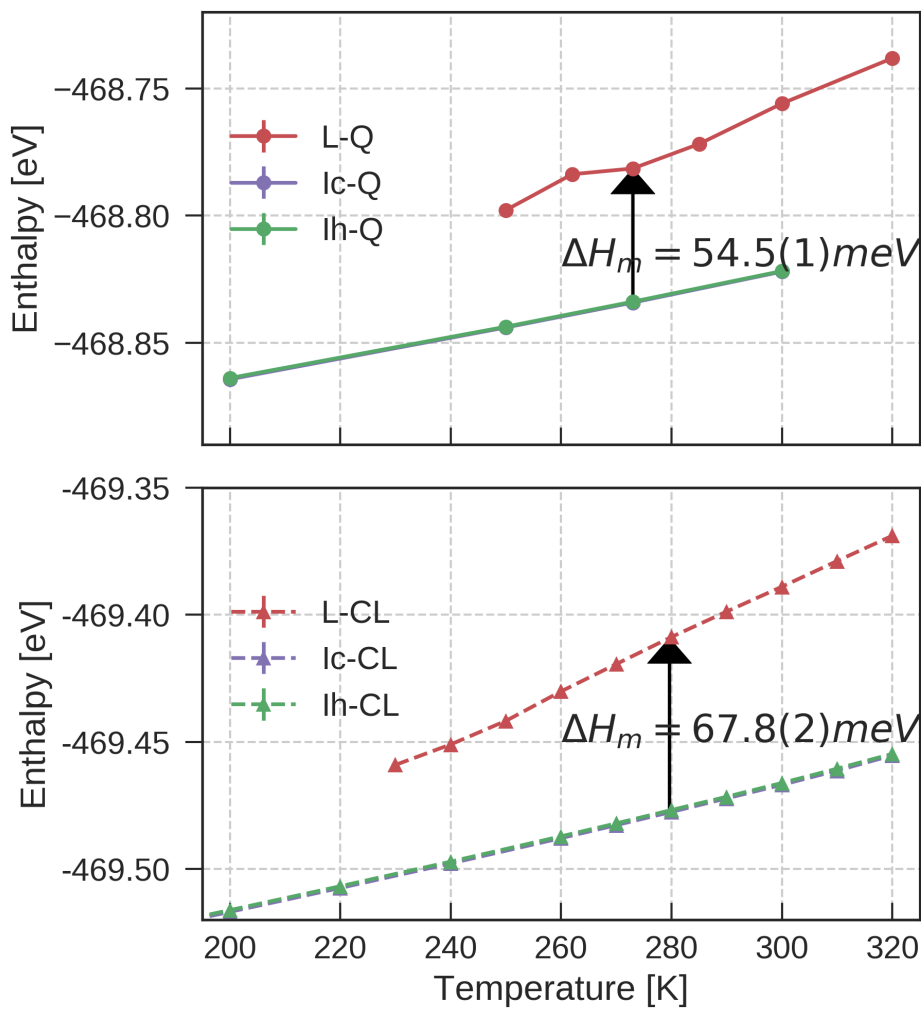

Fig. S3. The enthalpy of the water systems described by the NN potential.

745  
746  
747  
748  
749  
750  
751  
752  
753  
754  
755  
756  
757  
758  
759  
760  
761  
762  
763  
764  
765  
766  
767  
768  
769  
770  
771  
772  
773  
774  
775  
776  
777  
778  
779  
780  
781  
782  
783  
784  
785  
786  
787  
788  
789  
790  
791  
792  
793  
794  
795  
796  
797  
798  
799  
800  
801  
802  
803  
804  
805  
806

807  
808  
809  
810  
811  
812  
813  
814  
815  
816  
817  
818  
819  
820  
821  
822  
823  
824  
825  
826  
827  
828  
829  
830  
831  
832  
833  
834  
835  
836  
837  
838  
839  
840  
841  
842  
843  
844  
845  
846  
847  
848  
849  
850  
851  
852  
853  
854  
855  
856  
857  
858  
859  
860  
861  
862  
863  
864  
865  
866  
867  
868

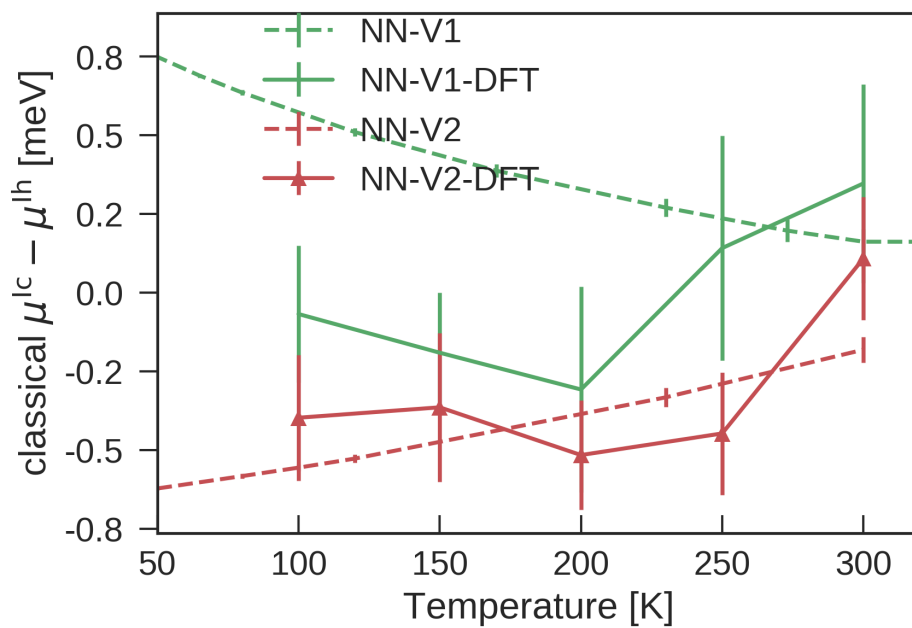

Fig. S4. The chemical potential difference between ice Ih and Ic predicted using two different neural network potentials (NN-V1 and NN-V2).

869 We have trained several NN potentials for the same underlying revPBE0-D3 DFT reference using different training sets 931  
870 and/or initial random seeds. In general, we notice subtle differences in the predictions of different neural networks. This is 932  
871 due to that, as mentioned in the main text, the fitting strategy for the NN, the finite cut-off radii applied to the description 933  
872 of atomic environments, and possible “holes” in the training set (18) inevitably lead to small residual errors between NN 934  
873 predictions and those obtained at the first-principles level of theory on which the NN is based. 935

874 To quantify the differences between different NN potentials, we select two NN potentials: (i) the first version of the NN 936  
875 (NN-V1) was trained using the first 1,000 liquid structures in the reference set, and (2) a refined version (NN-V2) was trained 937  
876 using all the 1,593 reference structures. NN-V2 is the NN that is actually employed in the simulations described in the main 938  
877 text. 939

878 Using each of the NN potential, we compute the chemical potential difference  $\Delta\mu_{\text{cl}}^{\text{Ih}\rightarrow\text{Ic}}$  between ice Ih and Ic at the classical 940  
879 level, following the steps and simulation setups described in the main text. It can be seen from Figure S4, the predictions on 941  
880 the chemical potential difference  $\Delta\mu_{\text{cl,NN}}^{\text{Ih}\rightarrow\text{Ic}}$  from the two neural networks differ by as much as 1 meV/H<sub>2</sub>O. However, after we 942  
881 promote the results back to the DFT level and obtain  $\Delta\mu_{\text{cl}}^{\text{Ih}\rightarrow\text{Ic}}$ , the discrepancy in the predictions largely diminished. 943  
882 944

#### 883 4. Predicting The chemical potential difference between ice Ih and Ic using the MB-Pol potential 945

884 We perform a thermodynamic integration in the NPT ensemble, using a parameter  $\lambda$  to perform the switching between the NN 946  
885 Hamiltonian  $\mathcal{H}_{\text{NN}}$  and the MB-Pol (14) Hamiltonian  $\mathcal{H}_{\text{MB}}$ . In practice, we run multiple simulations with the Hamiltonian 947  
886  $\mathcal{H}(\lambda) = (1 - \lambda)\mathcal{H}_{\text{NN}} + \lambda\mathcal{H}_{\text{MB}}$  at  $\lambda = 0.0, 0.2, 0.8, 1.0$ . The MB-Pol free energies of the ice Ic and Ih systems with 768 molecules 948  
887 described in the main text is evaluated using 949  
888 950

$$889 \quad G_{\text{MB}}(P, T) - G_{\text{NN}}(P, T) = \int_0^1 d\lambda \langle U_{\text{MB}} - U_{\text{NN}} \rangle_{P, T, \lambda}, \quad [1] \quad 951$$

892 where  $\langle \dots \rangle_{P, T, \lambda}$  denotes the ensemble average over NPT simulations using the Hamiltonian  $H(\lambda)$ . As the PESs described by 954  
893 MB-Pol and NN are extremely close, the integral in Eqn. Eq. (1) can be converged to below 0.01 meV from simulations of less 955  
894 than 100 picoseconds in total. We find that the difference between the classical chemical potentials of ice Ic and Ih using the 956  
895 MB-Pol potential is 0.2 meV/H<sub>2</sub>O lower than the classical NN prediction  $\Delta\mu_{\text{cl,NN}}^{\text{Ih}\rightarrow\text{Ic}}$ . 957  
896 958

#### 897 5. Other supplementary files 959

898 We have uploaded the following data files to the Materials Cloud repository 960  
899 <https://archive.materialscloud.org/2018.0020/v1> 961  
900 and a GitHub repository 962  
901 <https://github.com/BingqingCheng/ab-initio-thermodynamics-of-water>. 963  
902 964

#### 903 Additional data table S1 (NN-potential) 965

904 Parameters for the water neural network potential based on revPBE0-D3 DFT. Instructions and examples for running MD 966  
905 using this potential 967  
906 968

#### 907 Additional data table S2 (training-set) 969

908 The training (and test) set of the NN potential, including atomic configurations, energies, and forces. We have provided 970  
909 two formats: “input.data” is suitable for training NN potentials using the RuNNer code (19) or the N2P2 code (20, 21), and 971  
910 “dataset\_1593.xyz” is in a libatom xyz format. 972  
911 973

#### 912 Additional data table S3 (input-files) 974

913 We have uploaded the necessary input files for all the simulations (e.g. thermodynamic integration, path-integral molecular 975  
914 dynamics, interface pinning), as well as a Python notebook to help data analysis for the thermodynamic integration method. 976  
915 977  
916 978

#### 917 References 979

- 918 1. Lippert G, Hutter J, Parrinello M (1999) The Gaussian and augmented-plane-wave density functional method for ab initio 981  
919 molecular dynamics simulations. *Theoretical Chemistry Accounts* 103:124. 982
- 920 2. Zhang Y, Yang W (1998) Comment on “Generalized Gradient Approximation Made Simple”. *Physical Review Letters* 983  
921 80:890. 984
- 922 3. Adamo C, Barone V (1999) Toward reliable density functional methods without adjustable parameters: The PBE0 model. 985  
923 *Journal of Chemical Physics* 110:6158. 986
- 924 4. Goerigk L, Grimme S (2011) A thorough benchmark of density functional methods for general main group thermochemistry, 987  
925 kinetics, and noncovalent interactions. *Physical Chemistry Chemical Physics* 13:6670. 988
- 926 5. Grimme S, Antony J, Ehrlich S, Krieg S (2010) A consistent and accurate ab initio parametrization of density functional 989  
927 dispersion correction (dft-d) for the 94 elements H-Pu. *Journal of Chemical Physics* 132:154104. 990
- 928 6. Goerigk L, Grimme S (2011) A thorough benchmark of density functional methods for general main group thermochemistry, 991  
929 kinetics, and noncovalent interactions. *Physical Chemistry Chemical Physics* 13(14):6670–6688. 992  
930



|      |                                                                                                                                        |      |
|------|----------------------------------------------------------------------------------------------------------------------------------------|------|
| 993  | 7. Marsalek O, Markland TE (2017) Quantum Dynamics and Spectroscopy of Ab Initio Liquid Water: The Interplay of                        | 1055 |
| 994  | Nuclear and Electronic Quantum Effects. <i>J. Phys. Chem. Lett.</i> 8:1545.                                                            | 1056 |
| 995  | 8. Behler J, Parrinello M (2007) Generalized Neural-Network Representation of High-Dimensional Potential-Energy Surfaces.              | 1057 |
| 996  | <i>Phys. Rev. Lett.</i> 98:146401.                                                                                                     | 1058 |
| 997  | 9. Behler J (2011) Neural network potential-energy surfaces in chemistry: a tool for large-scale simulations. <i>PCCP</i> 13:17930–55. | 1059 |
| 998  | 10. Morawietz T, Singraber A, Dellago C, Behler J (2016) How van der waals interactions determine the unique properties of             | 1060 |
| 999  | water. <i>Proceedings of the National Academy of Sciences</i> 113(30):8368–8373.                                                       | 1061 |
| 1000 | 11. Imbalzano G, et al. (2018) Automatic selection of atomic fingerprints and reference configurations for machine-learning            | 1062 |
| 1001 | potentials. <i>The Journal of Chemical Physics</i> 148(24):241730.                                                                     | 1063 |
| 1002 | 12. Kresse G (1996) Software vasp, vienna, 1999; g. kresse, j. furthmüller. <i>Phys. Rev. B</i> 54(11):169.                            | 1064 |
| 1003 | 13. Lejaeghere K, et al. (2016) Reproducibility in density functional theory calculations of solids. <i>Science</i> 351(6280):aad3000. | 1065 |
| 1004 | 14. Reddy SK, et al. (2016) On the accuracy of the mb-pol many-body potential for water: Interaction energies, vibrational             | 1066 |
| 1005 | frequencies, and classical thermodynamic and dynamical properties from clusters to liquid water and ice. <i>The Journal of</i>         | 1067 |
| 1006 | <i>chemical physics</i> 145(19):194504.                                                                                                | 1068 |
| 1007 | 15. Raza Z, et al. (2011) Proton ordering in cubic ice and hexagonal ice; a potential new ice phase – XIc. <i>Physical Chemistry</i>   | 1069 |
| 1008 | <i>Chemistry</i> 13:19788–19795.                                                                                                       | 1070 |
| 1009 | 16. Macher M, Klimeš J, Franchini C, Kresse G (2014) The random phase approximation applied to ice. <i>The Journal of</i>              | 1071 |
| 1010 | <i>Chemical Physics</i> 140(8):084502.                                                                                                 | 1072 |
| 1011 | 17. Jackson SM, Nield VM, Whitworth RW, Oguro M, Wilson CC (1997) Single-crystal neutron diffraction studies of the                    | 1073 |
| 1012 | structure of ice XI. <i>Journal of Physical Chemistry B</i> 101:6142.                                                                  | 1074 |
| 1013 | 18. Behler J (2015) Constructing high-dimensional neural network potentials: A tutorial review. <i>International Journal of</i>        | 1075 |
| 1014 | <i>Quantum Chemistry</i> 115(16):1032–1050.                                                                                            | 1076 |
| 1015 | 19. Behler J (2018) <i>RuNNer – A Neural Network Code for High-Dimensional Neural Network Potentials.</i> (Universität                 | 1077 |
| 1016 | Göttingen).                                                                                                                            | 1078 |
| 1017 | 20. Singraber A, Behler J, Dellago C (In press) A library-based lammps implementation of high-dimensional neural network               | 1079 |
| 1018 | potentials. <i>The Journal of Chemical Theory and Computation.</i>                                                                     | 1080 |
| 1019 | 21. Singraber A (2018) Compphysvienna/n2p2: Neural network potential package 1.0.0.                                                    | 1081 |
| 1020 |                                                                                                                                        | 1082 |
| 1021 |                                                                                                                                        | 1083 |
| 1022 |                                                                                                                                        | 1084 |
| 1023 |                                                                                                                                        | 1085 |
| 1024 |                                                                                                                                        | 1086 |
| 1025 |                                                                                                                                        | 1087 |
| 1026 |                                                                                                                                        | 1088 |
| 1027 |                                                                                                                                        | 1089 |
| 1028 |                                                                                                                                        | 1090 |
| 1029 |                                                                                                                                        | 1091 |
| 1030 |                                                                                                                                        | 1092 |
| 1031 |                                                                                                                                        | 1093 |
| 1032 |                                                                                                                                        | 1094 |
| 1033 |                                                                                                                                        | 1095 |
| 1034 |                                                                                                                                        | 1096 |
| 1035 |                                                                                                                                        | 1097 |
| 1036 |                                                                                                                                        | 1098 |
| 1037 |                                                                                                                                        | 1099 |
| 1038 |                                                                                                                                        | 1100 |
| 1039 |                                                                                                                                        | 1101 |
| 1040 |                                                                                                                                        | 1102 |
| 1041 |                                                                                                                                        | 1103 |
| 1042 |                                                                                                                                        | 1104 |
| 1043 |                                                                                                                                        | 1105 |
| 1044 |                                                                                                                                        | 1106 |
| 1045 |                                                                                                                                        | 1107 |
| 1046 |                                                                                                                                        | 1108 |
| 1047 |                                                                                                                                        | 1109 |
| 1048 |                                                                                                                                        | 1110 |
| 1049 |                                                                                                                                        | 1111 |
| 1050 |                                                                                                                                        | 1112 |
| 1051 |                                                                                                                                        | 1113 |
| 1052 |                                                                                                                                        | 1114 |
| 1053 |                                                                                                                                        | 1115 |
| 1054 |                                                                                                                                        | 1116 |
